# Supplementary material for: Reduced glucosinolate content in oilseed rape (Brassica napus L.) by random mutagenesis of BnMYB28 and BnCYP79F1 genes
Source: Springer Nature journal article supplement (doi:10.1038/s41598-023-28661-6), 2023-02-09
Supplement: MOESM1 [file 41598_2023_28661_MOESM1_ESM.pdf]

## Supplementary Tables

**Supplementary Table S1:** List of primers developed for RT-qPCR analyses.

| Gene name            | Primer name  | Primer sequence (5' → 3')  | T <sub>m</sub> (°C) | Amplicon length (bp) |
|----------------------|--------------|----------------------------|---------------------|----------------------|
| <i>BnMYB28.C09</i>   | GSL_rt_2_6_F | acagttcacgcctcttactcc      | 60                  | 144                  |
|                      | GSL_2_6_R    | gcttcatgcttctcgtgga        |                     |                      |
| <i>BnMYB28.A03</i>   | GSL_2_5_F    | gcttcatgcttctcgtggt        | 64                  | 194                  |
|                      | GSL_2_2_R    | gcaaattctctggaggcgtgttgaca |                     |                      |
| <i>BnMYB28.Cnn</i>   | GSL_2_3_F    | cgaacagggtattgatccca       | 58                  | 264                  |
|                      | GSL_rt_2_3_R | gtgaccttagccgcaacttg       |                     |                      |
| <i>BnCYP79F1.C05</i> | GSL_3_1_F    | cgccggaacacacgccatca       | 64                  | 258                  |
|                      | GSL_rt_3_1_R | gcaaggagggtgtccgcttcaat    |                     |                      |
| <i>BnCYP79F1.A06</i> | GSL_rt_3_2_F | ggtatacaaaccagagcgtcacctc  | 64                  | 222                  |
|                      | GSL_3_2_R    | cctctagacttaacgggtccg      |                     |                      |
| <i>BnACTIN2</i>      | ACT1_F       | tctggtgatggtgtgtctca       | 60                  | 141                  |
|                      | ACT2_R       | ggtcaacatgtaccctctctcg     |                     |                      |
| <i>BnGAPDH</i>       | GC1_F        | ccgcttgcttcaacatcatt       | 60                  | 160                  |
|                      | GC2_R        | tctgaggtctttcgacgctg       |                     |                      |

Primers were designed based on the *Darmor-bzh* reference genome (Genoscope).

F= Forward primer, R= Reverse primer

**Supplementary Table S2:** List of primers used for generating amplicons for mutant screening. One amplicon per paralog was used for mutant detection.

| <i>B. napus</i> gene name | Darmor ID            | Standard PCR <sup>[1]</sup> |                           | TILLING PCR <sup>[2]</sup> |                           |                                             |                              |
|---------------------------|----------------------|-----------------------------|---------------------------|----------------------------|---------------------------|---------------------------------------------|------------------------------|
|                           |                      | Primer name                 | Primer sequence (5' → 3') | TILLING primer name        | Primer sequence (5' → 3') | TILLING amplicon length (bp) <sup>[3]</sup> | cDNA coverage <sup>[4]</sup> |
| <i>BnMYB28.C09</i>        | <i>BnaC09g05300D</i> | SJ_0082                     | acagttcacgcctcttactcc     | SJ_0094                    | gagcttctctattctcatcctag   | 902                                         | 65%                          |
|                           |                      | SJ_0083                     | ggcttgtgagtcacgggatcag    | SJ_0095                    | gaccgaccacctaaagaccag     |                                             |                              |
| <i>BnMYB28.A03</i>        | <i>BnaA03g40190D</i> | SJ_0084                     | catgaaaacaccttgacgcta     | SJ_0096                    | gcattcttgggtgttttgaggg    | 1,706                                       | 73%                          |
|                           |                      | SJ_0085                     | ctcgggattactaacctgaaggc   | SJ_0097                    | gcgttggactatcctcttc       |                                             |                              |
| <i>BnCYP79F1.C05</i>      | <i>BnaC05g12520D</i> | SJ_0086                     | gacaatgatgatgaccttacc     | SJ_0098                    | ccgacttcgcagaccggcct      | 1,516                                       | 59%                          |
|                           |                      | SJ_0087                     | cctctagacttaacggcca       | SJ_0099                    | cggcctattccaggacgg        |                                             |                              |
| <i>BnCYP79F1.A06</i>      | <i>BnaA06g11010D</i> | SJ_0088                     | gttgttggaggagacatc        | SJ_0100                    | cattgacgagagggtggagc      | 1,180                                       | 38%                          |
|                           |                      | SJ_0089                     | cctctagacttaacggcca       | SJ_0101                    | ccatcatgatcgtcccacttg     |                                             |                              |

[1] Standard PCR was done using unlabeled primers.

[2] TILLING PCR was done using a combination of unlabeled and infrared (IR) labeled primers. Forward and reverse primers were labeled with DY681 and DY781 probes, respectively. The TILLING PCR was done as a nested PCR using amplicons from the standard PCR as the template.

[3] Length of the amplicon analyzed for detection of EMS-induced mutations.

[4] Share of the total cDNA encompassed in the analyzed amplicon for detection of EMS-induced mutations.

**Supplementary Table S3:** HPLC analysis using commercial glucosinolate standards.

| <b>Compound</b>    | <b>Side chain</b>                 | <b>Retention Time (min)</b> | <b>HPLC calibration (linear regression) [a]</b> |
|--------------------|-----------------------------------|-----------------------------|-------------------------------------------------|
| Glucoiberin        | 3-me-sulfinylpropyl               | 5.79                        | (area-3367)/162966                              |
| Progoitrin         | (2 <i>R</i> )-2 hydroxy-3-butenyl | 6.43                        | (area+1631)/164513                              |
| Epiprogoitrin      | (2 <i>S</i> )-2 hydroxy-3-butenyl | 6.60                        | (area+18347)/157248                             |
| Sinigrin           | 2-propenyl                        | 6.66                        | (area-11372)/199282                             |
| Glucoraphanin      | 4-me-sulfinylbutyl                | 6.65                        | (area+19466)/174317                             |
| Gluconapin         | 3-butenyl                         | 7.69                        | (area-5783)/175044                              |
| Glucobrassicinapin | 4-pentenyl                        | 8.77                        | (area-9690)/162867                              |
| Glucotropaeolin    | benzyl                            | 8.91                        | (area-9122)/198955                              |
| Glucobrassicin     | 3-Indolylmethyl                   | 9.40                        | (area-11784)/552644                             |
| Gluconasturtiin    | phenethyl                         | 10.00                       | (area-5888)/164863                              |

[a] conversion from (area under the peak) to (nmol GSL)

**Supplementary Table S4:** All EMS-induced mutations detected in two *BnMYB28* and two *BnCYP79F1* paralogs. Mutation positions are relative to the translation start site.

| <i>B. napus</i> gene name | M <sub>2</sub> plant name <sup>[1]</sup> | M <sub>2</sub> mutant zygosity <sup>[2]</sup> | Mutation position on gDNA | cDNA change | Amino acid change | Mutation type |
|---------------------------|------------------------------------------|-----------------------------------------------|---------------------------|-------------|-------------------|---------------|
| <i>BnMYB28.C09</i>        | 70_F4                                    | Hom                                           | G 12 C                    | G 12 C      | K 4 N             | Missense      |
|                           | 70_H4                                    | Het                                           | G 12 C                    | G 12 C      | K 4 N             | Missense      |
|                           | 49_F2                                    | Het                                           | G 26 A                    | G 26 A      | G 9 E             | Missense      |
|                           | 66_B11                                   | Het                                           | G 28 A                    | G 28 A      | E 10 K            | Missense      |
|                           | 71_B4                                    | Hom                                           | G 28 A                    | G 28 A      | E 10 K            | Missense      |
|                           | 72_E9                                    | Het                                           | G 31 A                    | G 31 A      | G 11 R            | Missense      |
|                           | 71_E9                                    | Het                                           | G 43 A                    | G 43 A      | G 15 R            | Missense      |
|                           | 71_H9                                    | Hom                                           | G 43 A                    | G 43 A      | G 15 R            | Missense      |
|                           | 8_E5                                     | Het                                           | G 43 A                    | G 43 A      | G 43 R            | Missense      |
|                           | 64_C10                                   | Het                                           | G 45 A                    | G 45 A      | A 15 A            | Silent        |
|                           | 3_H2                                     | Het                                           | G 51 A                    | G 51 A      | W 17 *            | Nonsense      |
|                           | 11_H7                                    | Het                                           | G 51 A                    | G 51 A      | W 17 *            | Nonsense      |
|                           | 54_F10                                   | Het                                           | C 78 T                    | C 78 T      | I 26 I            | Silent        |
|                           | 43_E3                                    | Hom                                           | G 97 A                    | G 97 A      | G 33 R            | Missense      |
|                           | 54_C6                                    | Het                                           | G 98 A                    | G 98 A      | G 33 E            | Missense      |
|                           | 12_A9                                    | Hom                                           | C 122 T                   | C 122 T     | P 41 L            | Missense      |
|                           | 54_B9                                    | Het                                           | G 133 A                   | G 133 A     | G 45 R            | Missense      |
|                           | 54_C6                                    | Het                                           | G 250 A                   | G 149 A     | G 50 E            | Missense      |
|                           | 7_C6                                     | Het                                           | C 289 T                   | C 188 T     | P 63 L            | Missense      |
|                           | 7_D6                                     | Hom                                           | C 289 T                   | C 188 T     | P 63 L            | Missense      |
|                           | 76_D11                                   | Hom                                           | G 303 A                   | G 202 A     | G 68 S            | Missense      |
|                           | 64_A8                                    | Het                                           | G 303 A                   | G 202 A     | G 68 S            | Missense      |
|                           | 68_H6                                    | Hom                                           | G 303 A                   | G 202 A     | G 68 S            | Missense      |
|                           | 68_A11                                   | Het                                           | G 323 A                   | G 222 A     | E 74 E            | Silent        |
|                           | 45_B8                                    | Het                                           | C 335 T                   | C 234 T     | I 78 I            | Silent        |
|                           | 11_A5                                    | Het                                           | G 329 A                   | G 329 A     | Q 228 Q           | Silent        |
|                           | <i>BnMYB28.A03</i>                       | 54_F3                                         | Hom                       | G 50 A      | G 50 A            | W 17 *        |
| 48_C8                     |                                          | Hom                                           | G 51 A                    | G 51 A      | W 17 *            | Nonsense      |
| 48_D8                     |                                          | Hom                                           | G 51 A                    | G 51 A      | W 17 *            | Nonsense      |
| 54_E1                     |                                          | Het                                           | G 61 A                    | G 61 A      | E 21 K            | Missense      |
| 48_H3                     |                                          | Het                                           | G 223 A                   | G 134 A     | G 45 E            | Missense      |
| 48_D3                     |                                          | Hom                                           | G 317 A                   | G 228 A     | Q 76 Q            | Silent        |

|                      |        |     |          |          |         |          |
|----------------------|--------|-----|----------|----------|---------|----------|
|                      | 50_E3  | Het | C 706 T  | C 421 T  | P 141 S | Missense |
|                      | 56_E12 | Hom | G 737 A  | G 452 A  | S 151 N | Missense |
|                      | 50_E3  | Het | C 899 T  | C 614 T  | T 205 I | Missense |
| <i>BnCYP79F1.C05</i> | 52_C8  | Het | C 424 T  | C 424 T  | E 142 * | Nonsense |
|                      | 64_C7  | Hom | C 560 T  | C 560 T  | T 187 I | Missense |
|                      | 64_F6  | Het | C 606 T  | C 606 T  | T 202 T | Silent   |
|                      | 54_A6  | Het | C 654 T  | C 654 T  | F 218 F | Silent   |
|                      | 53_B5  | Hom | G 770 A  | G 770 A  | G 257 D | Missense |
|                      | 63_E7  | Hom | G 850 A  | G 850 A  | E 284 K | Missense |
|                      | 65_E3  | Hom | C 956 T  | C 956 T  | P 319 L | Missense |
|                      | 65_A8  | Het | C 1399 T | C 1107 T | D 369 D | Silent   |
|                      | 66_F6  | Het | G 1401 A | G 1109 A | R 370 K | Missense |
|                      | 53_C5  | Het | C 1430 T | C 1138 T | L 380 L | Silent   |
|                      | 53_D5  | Het | C 1430 T | C 1138 T | L 380 L | Silent   |
|                      | 56_A4  | Het | C 1430 T | C 1138 T | L 380 L | Silent   |
|                      | 61_A10 | Het | C 1521 T | C 1229 T | T 410 I | Missense |
|                      | 61_C10 | Het | C 1521 T | C 1229 T | T 410 I | Missense |
| <i>BnCYP79F1.A06</i> | 61_A2  | Het | G 938 A  | G 938 A  | G 313 E | Missense |
|                      | 45_D7  | Het | G 1379 A | G 1090 A | E 364 K | Missense |
|                      | 41_A5  | Het | G 1384 A | G 1095 A | V 365 V | Silent   |
|                      | 46_B6  | Het | G 1384 A | G 1095 A | V 365 V | Silent   |
|                      | 53_B9  | Het | G 1385 A | G 1096 A | V 366 M | Missense |
|                      | 53_C9  | Het | G 1385 A | G 1096 A | V 366 M | Missense |
|                      | 46_F5  | Het | G 1394 A | G 1105 A | D 368 N | Missense |
|                      | 44_F12 | Het | G 1399 A | G 1110 A | R 370 R | Silent   |
|                      | 44_H12 | Hom | G 1399 A | G 1110 A | R 370 R | Silent   |
|                      | 44_G12 | Het | G 1399 A | G 1110 A | R 370 R | Silent   |
|                      | 63_G10 | Het | C 1413 T | C 1124 T | S 375 F | Missense |
|                      | 69_F7  | Hom | C 1472 T | C 1183 T | P 395 S | Missense |
|                      | 74_A7  | Het | C 1472 T | C 1183 T | P 395 S | Missense |
|                      | 69_H7  | Het | C 1472 T | C 1183 T | P 395 S | Missense |
|                      | 43_F5  | Het | C 1473 T | C 1184 T | P 395 L | Missense |
|                      | 43_G5  | Het | C 1473 T | C 1184 T | P 395 L | Missense |
|                      | 48_A12 | Het | C 1473 T | C 1184 T | P 395 L | Missense |
|                      | 48_D12 | Het | C 1473 T | C 1184 T | P 395 L | Missense |
|                      | 76_A4  | Het | C 1473 T | C 1184 T | P 395 L | Missense |
|                      | 75_B9  | Het | C 1489 T | C 1200 T | V 400 V | Silent   |
|                      | 42_B3  | Het | G 1511 A | G 1222 A | D 408 N | Missense |

|        |     |          |          |         |          |
|--------|-----|----------|----------|---------|----------|
| 61_A2  | Het | G 1511 A | G 1222 A | D 408 N | Missense |
| 51_C7  | Hom | C 1519 T | C 1230 T | T 410 T | Silent   |
| 55_B2  | Hom | C 1520 T | C 1231 T | L 411 F | Missense |
| 63_E8  | Hom | C 1538 T | C 1249 T | P 417 S | Missense |
| 44_G6  | Het | G 1852 A | G 1289 A | G 430 D | Missense |
| 44_H12 | Hom | G 1898 A | G 1335 A | E 445 E | Silent   |
| 44_F12 | Het | G 1898 A | G 1335 A | E 445 E | Silent   |
| 44_G12 | Het | G 1898 A | G 1335 A | E 445 E | Silent   |

---

[1] Name of the single M<sub>2</sub> mutant as per the Express617 EMS mutant resource (Harloff et al., 2012).

[2] Zygosity of EMS-induced mutations observed in single M<sub>2</sub> individuals.

Silent mutations do not confer changes in polypeptide sequences.

\* Premature stop codon mutation.

**Supplementary Table S5:** Summary statistics of functional effects conferred by the EMS-induced mutations in *BnMYB28* and *BnCYP79F1* paralogs. One amplicon per paralog was used for screening EMS-induced mutations.

| Gene name            | cDNA coverage | Number of M <sub>2</sub> pools screened [1] | Number of detected mutations |                    |                  |                       | Mutation frequency (1/kb) [2] |
|----------------------|---------------|---------------------------------------------|------------------------------|--------------------|------------------|-----------------------|-------------------------------|
|                      |               |                                             | Nonsense mutations           | Missense mutations | Silent mutations | Splice site mutations |                               |
| <i>BnMYB28.C09</i>   | 65%           | 13                                          | 2                            | 19                 | 5                | 0                     | 1/37.8                        |
| <i>BnMYB28.A03</i>   | 73%           | 4                                           | 3                            | 5                  | 1                | 0                     | 1/67.0                        |
| <i>BnCYP79F1.C05</i> | 59%           | 4                                           | 1                            | 7                  | 6                | 0                     | 1/38.0                        |
| <i>BnCYP79F1.A06</i> | 38%           | 9                                           | 0                            | 19                 | 10               | 0                     | 1/31.5                        |
| Total = 78           |               |                                             |                              |                    |                  |                       | Average = 1/43.5 kb           |

[1] The number of eight-fold (8x) two-dimensional (2-D) M<sub>2</sub> pools used for screenings.

[2] Calculated as the number of mutations per M<sub>1</sub> plant based on the number of analyzed M<sub>2</sub> families (8x 2D pools) and amplicon lengths.

**Supplementary Table S6:** Mutant genotyping in the M<sub>3</sub> generation to select crossing parents for the combination of single mutations.

| M <sub>3</sub> seed code | Gene name            | M <sub>2</sub> genotype                                     | Germination rate (%) | Mutation position on gDNA <sup>[1]</sup> | cDNA change | AA change <sup>[2]</sup> | Number of M <sub>3</sub> plants genotyped | No. M <sub>3</sub> genotypes observed |                     |                    |
|--------------------------|----------------------|-------------------------------------------------------------|----------------------|------------------------------------------|-------------|--------------------------|-------------------------------------------|---------------------------------------|---------------------|--------------------|
|                          |                      |                                                             |                      |                                          |             |                          |                                           | Homozygous WT                         | Heterozygous mutant | Homozygous mutants |
| 190623                   | <i>BnMYB28.C09</i>   | <i>A<sub>1</sub>A<sub>e</sub>B<sub>e</sub>B<sub>e</sub></i> | 80                   | G 51 A                                   | G 17 A      | W 17 *                   | 12                                        | 6                                     | 4                   | 2                  |
| 190624                   | <i>BnMYB28.C09</i>   | <i>A<sub>1</sub>A<sub>e</sub>B<sub>e</sub>B<sub>e</sub></i> | 67                   | G 51 A                                   | G 17 A      | W 17 *                   | 10                                        | 1                                     | 8                   | 1                  |
| 190625                   | <i>BnMYB28.A03</i>   | <i>A<sub>e</sub>A<sub>e</sub>B<sub>1</sub>B<sub>1</sub></i> | 60                   | G 50 A                                   | G 50 A      | W 17 *                   | 4                                         | 0                                     | 0                   | 4                  |
| 190628                   | <i>BnCYP79F1.C05</i> | <i>C<sub>1</sub>C<sub>e</sub>D<sub>e</sub>D<sub>e</sub></i> | 60                   | C 424 T                                  | C 424 T     | E 142 *                  | 9                                         | 3                                     | 2                   | 4                  |
| 190630                   | <i>BnCYP79F1.A06</i> | <i>C<sub>e</sub>C<sub>e</sub>D<sub>1</sub>D<sub>1</sub></i> | 80                   | G 1379 A                                 | G 1090 A    | E 364 K                  | 11                                        | 0                                     | 0                   | 11                 |

Plants were genotyped using Sanger sequencing of PCR fragments encompassing expected EMS-induced mutations.

All genotypes have been named as per designated allele codes (Table 2).

[1] Position of EMS induced mutation on the gDNA from the translational start site

[2] Position of amino acid change on the polypeptide chain

\*Premature stop codon



**Supplementary Table S7:** Genotypes of parents used for hand crosses and the offspring derived thereof to combine single EMS mutants of *BnMYB28* and *BnCYP79F1* and genotypes of selected crossing parents and their progenies used for phenotyping experiments.

| Crossing type                   | Parental genotypes                                                                                                        | Genotype of selected F <sub>1</sub> progeny                 | F <sub>2</sub> seed code <sup>[a]</sup> | Genotypes used for phenotyping experiments <sup>[1]</sup>                                                                                                                                                                                             |
|---------------------------------|---------------------------------------------------------------------------------------------------------------------------|-------------------------------------------------------------|-----------------------------------------|-------------------------------------------------------------------------------------------------------------------------------------------------------------------------------------------------------------------------------------------------------|
| M <sub>3</sub> x M <sub>3</sub> | <i>A<sub>e</sub>A<sub>e</sub>B<sub>1</sub>B<sub>1</sub></i> x <i>A<sub>1</sub>A<sub>1</sub>B<sub>e</sub>B<sub>e</sub></i> | <i>A<sub>1</sub>A<sub>e</sub>B<sub>1</sub>B<sub>e</sub></i> | 200527                                  | <i>A<sub>e</sub>A<sub>e</sub>B<sub>e</sub>B<sub>e</sub></i> , <i>A<sub>1</sub>A<sub>1</sub>B<sub>e</sub>B<sub>e</sub></i> , <i>A<sub>e</sub>A<sub>e</sub>B<sub>1</sub>B<sub>1</sub></i> , <i>A<sub>1</sub>A<sub>1</sub>B<sub>1</sub>B<sub>1</sub></i> |
|                                 | <i>C<sub>e</sub>C<sub>e</sub>D<sub>1</sub>D<sub>1</sub></i> x <i>C<sub>1</sub>C<sub>1</sub>D<sub>e</sub>D<sub>e</sub></i> | <i>C<sub>1</sub>C<sub>e</sub>D<sub>1</sub>D<sub>e</sub></i> | 200529                                  | <i>C<sub>e</sub>C<sub>e</sub>D<sub>e</sub>D<sub>e</sub></i> , <i>C<sub>1</sub>C<sub>1</sub>D<sub>e</sub>D<sub>e</sub></i> , <i>C<sub>e</sub>C<sub>e</sub>D<sub>1</sub>D<sub>1</sub></i> , <i>C<sub>1</sub>C<sub>1</sub>D<sub>1</sub>D<sub>1</sub></i> |

All genotypes have been named as per designated allele codes (refer to Table 2).

Non-mutated wildtype alleles from Express617 are represented by the 'e' suffix in subscript.

[1] For quantitative and qualitative glucosinolate determination.

[a] Segregating F<sub>2</sub> population originating from heterozygous *BnMYB28* and *BnCYP79F1* double mutants (originating from direct M<sub>3</sub>xM<sub>3</sub> crosses).

**Supplementary Table S8:** Summary statistics of individual glucosinolates identified with corresponding concentrations estimated in seeds of *BnMYB28* EMS mutants and controls. Analyses were done using high-performance liquid chromatography.

| Glucosinolate type <sup>[a]</sup> | F <sub>2</sub> population <sup>[1]</sup> |      |                       |       |              |      |
|-----------------------------------|------------------------------------------|------|-----------------------|-------|--------------|------|
|                                   | Population 200527                        |      |                       |       | Control      |      |
|                                   | <i>BnMYB28</i><br>_DM                    | SD   | <i>BnMYB28</i><br>_WT | SD    | Express617   | SD   |
| Glucoiberin                       | 0.53                                     | 0.25 | 0.30                  | 0.08  | 0.10         | 0.01 |
| Progoitrin                        | 16.20                                    | 6.52 | 41.22                 | 13.05 | 36.32        | 5.09 |
| Epiprogoitrin                     | 0.57                                     | 0.16 | 1.37                  | 0.41  | 1.18         | 0.27 |
| Sinigrin + Glucoraphanin          | 1.12                                     | 0.86 | 0.27                  | 0.21  | 0.64         | 0.08 |
| Gluconapoleiferin                 | 0.04                                     | 0.02 | 0.11                  | 0.07  | n.d          |      |
| Glucoallysin                      | 1.03                                     | 0.41 | 2.82                  | 0.72  | 2.94         | 0.05 |
| Gluconapin                        | 6.05                                     | 2.70 | 5.66                  | 1.06  | 9.93         | 2.52 |
| 4-Hydroxyglucobrassicin           | 2.56                                     | 0.61 | 2.31                  | 0.16  | 2.23         | 0.32 |
| Glucobrassicinapin                | 0.64                                     | 0.48 | 4.33                  | 1.30  | 5.27         | 0.88 |
| Glucotropaeolin                   | 0.75                                     | 0.14 | 0.76                  | 0.06  | 0.50         | 0.08 |
| Glucobrassicin                    | 0.26                                     | 0.12 | 0.13                  | 0.03  | 0.20         | 0.36 |
| Gluconasturtiin                   | 1.08                                     | 0.24 | 1.07                  | 0.13  | 0.73         | 0.16 |
| <b>Sum (μmol/g DW)</b>            | <b>30.83</b>                             |      | <b>60.35</b>          |       | <b>60.04</b> |      |

[1] Experiments with plants originating from direct M<sub>3</sub>xM<sub>3</sub> crosses without backcrossing.

[a] Estimated based on comparison of retention time and co-chromatography with commercial standards. GSL concentrations were calculated as μmol/g dry weight of tissue analyzed (five biological replicates per genotype). *BnMYB28*\_DM: *BnMYB28* double mutant (genotype *A<sub>1</sub>A<sub>1</sub>B<sub>1</sub>B<sub>1</sub>*), *BnMYB28*\_WT: Plants with wildtype alleles for *BnMYB28* segregating within the same F<sub>2</sub> population, Express617: non-mutagenized parent  
n.d: Not detectable SD: Standard deviation

**Supplementary Table S9:** Summary statistics of individual glucosinolates identified with corresponding concentrations estimated in seeds of *BnCYP79F1* EMS mutants and controls. Analyses were done using high-performance liquid chromatography.

| Glucosinolate type <sup>[a]</sup> | F <sub>2</sub> population <sup>[1]</sup> |      |                         |      |              |      |
|-----------------------------------|------------------------------------------|------|-------------------------|------|--------------|------|
|                                   | Population 200529                        |      |                         |      | Controls     |      |
|                                   | <i>BnCYP79F1</i><br>_DM                  | SD   | <i>BnCYP79F1</i><br>_WT | SD   | Express617   | SD   |
| Glucoiberin                       | 0.01                                     | 0.01 | 0.04                    | 0.02 | 0.10         | 0.01 |
| Progoitrin                        | 24.55                                    | 1.09 | 37.53                   | 8.41 | 36.32        | 5.09 |
| Epirogoitrin                      | 0.78                                     | 0.07 | 1.12                    | 0.17 | 1.18         | 0.27 |
| Sinigrin + Glucoraphanin          | 0.45                                     | 0.07 | 0.42                    | 0.03 | 0.64         | 0.08 |
| Gluconapoleiferin                 | 0.08                                     | 0.02 | 0.05                    | 0.02 | n.d          |      |
| Glucoallysin                      | 3.28                                     | 0.15 | 2.47                    | 0.55 | 2.94         | 0.05 |
| Gluconapin                        | 6.91                                     | 0.20 | 8.91                    | 0.73 | 9.93         | 2.52 |
| 4-Hydroxyglucobrassicin           | 4.40                                     | 0.19 | 3.81                    | 0.68 | 2.23         | 0.32 |
| Glucobrassicinapin                | 4.02                                     | 0.15 | 3.33                    | 0.68 | 5.27         | 0.88 |
| Glucotropaeolin                   | 1.02                                     | 0.04 | 0.90                    | 0.13 | 0.50         | 0.08 |
| Glucobrassicin                    | 0.31                                     | 0.05 | 0.19                    | 0.06 | 0.20         | 0.36 |
| Gluconasturtiin                   | 1.62                                     | 0.07 | 1.56                    | 0.13 | 0.73         | 0.16 |
| <b>Sum (μmol/g DW)</b>            | <b>47.43</b>                             |      | <b>60.33</b>            |      | <b>60.04</b> |      |

[1] Experiments with plants originating from direct M<sub>3</sub>xM<sub>3</sub> crosses without backcrossing.

[a] Estimated based on comparison of retention time and co-chromatography with commercial standards. GSL concentrations were calculated as μmol/g dry weight of tissue analyzed (five biological replicates per genotype).

*BnCYP79F1*\_DM: *BnMYB28* double mutant (genotype *C<sub>1</sub>C<sub>1</sub>D<sub>1</sub>D<sub>1</sub>*), *BnCYP79F1*\_WT: Plants with wildtype alleles for *BnCYP79F1* segregating within the same F<sub>2</sub> population, Express617: non-mutagenized parent

n.d: Not detectable SD: Standard deviation
